# Supplementary material
Source: PubMed Central journal article supplement (PMC3040470)

# Supplemental Figure 1

**A**

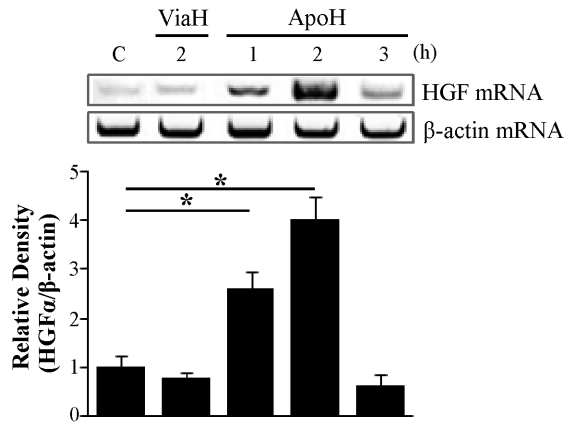

**B**

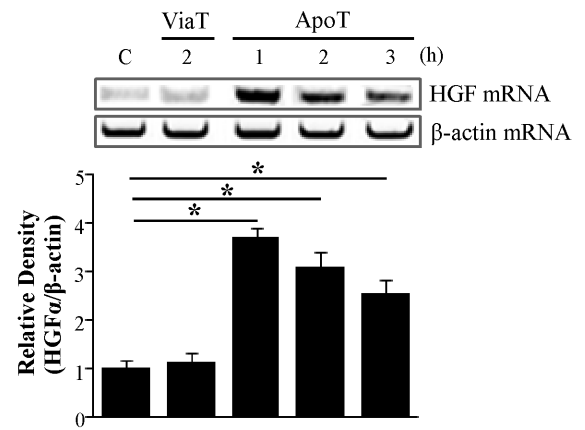

## Supplemental Figure 2

**A**

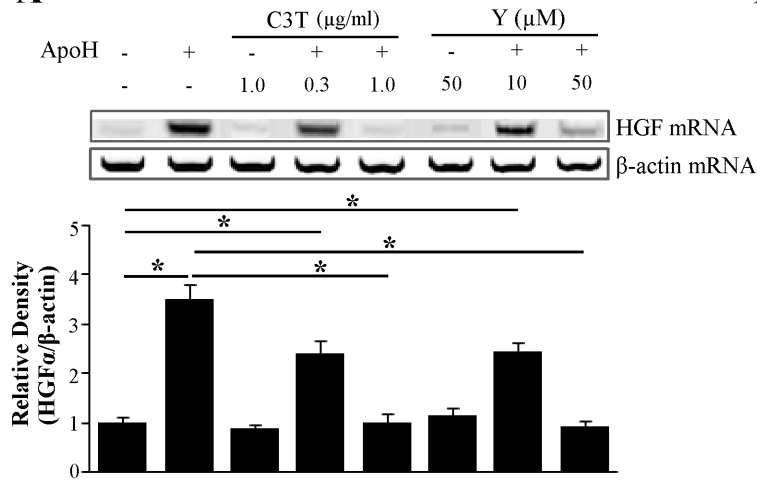

**B**

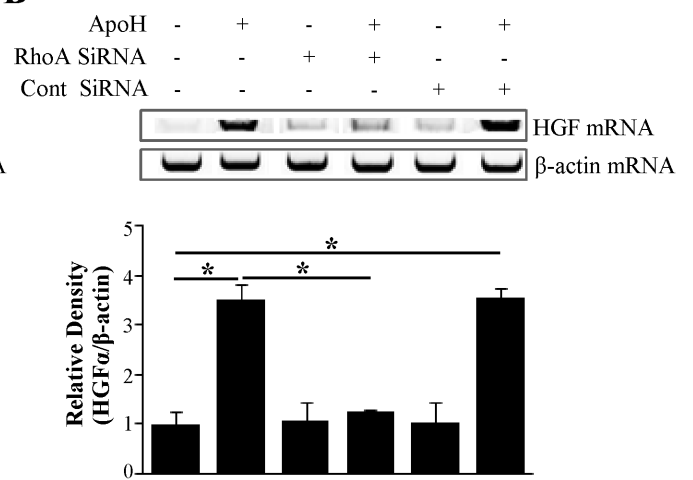

**C**

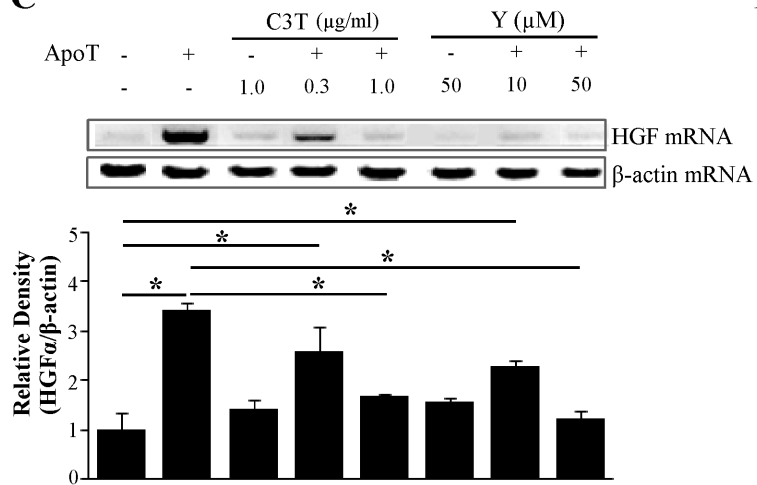

**D**

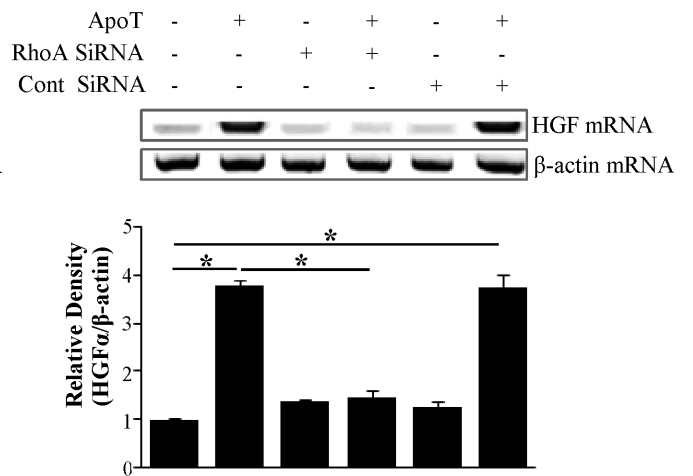

Supplement: supp_jlb.0710414_2A0710-414_Park_suppl_figs.pdf [file supp_jlb.0710414_2A0710-414_Park_suppl_figs.pdf]
